# Supplementary material
Source: publisher figshare collection journal article supplement (https://acs.figshare.com/ndownloader/files/13514942)
Supplement: Supplementary file 1 [file 13514942]

# Supporting Information: Improving the Performance of DNA Strand Displacement Circuits by Shadow Cancellation

Tianqi Song,<sup>†</sup> Nikhil Gopalkrishnan,<sup>‡</sup> Abeer Eshra,<sup>†,¶</sup> Sudhanshu Garg,<sup>†</sup> Reem  
Mokhtar,<sup>†</sup> Hieu Bui,<sup>§</sup> Harish Chandran,<sup>||</sup> and John Reif<sup>\*,†,⊥</sup>

<sup>†</sup>*Department of Computer Science, Duke University, Durham, North Carolina 27708,  
United States*

<sup>‡</sup>*Wyss Institute, Harvard University, Boston, Massachusetts 02115, United States*

<sup>¶</sup>*Department of Computer Science and Engineering, Faculty of Electronic Eng., Menoufia  
University, Menouf, Menoufia 32831, Egypt*

<sup>§</sup>*National Research Council, 500 Fifth Street NW, Keck 576, Washington, DC 20001,  
United States*

<sup>||</sup>*DeepMind, Mountain View, California 94043, United States*

<sup>⊥</sup>*Department of Electrical and Computer Engineering, Duke University, Durham, North  
Carolina 27708, United States*

E-mail: reif@cs.duke.edu

# 1 Three Repeats for Each Scenario

## 1.1 The amplifier

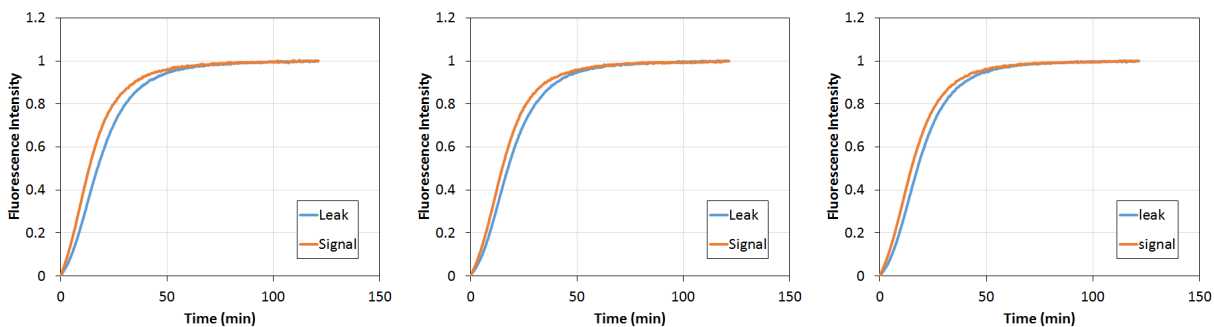

## 1.2 The amplifier with cancellation complexes

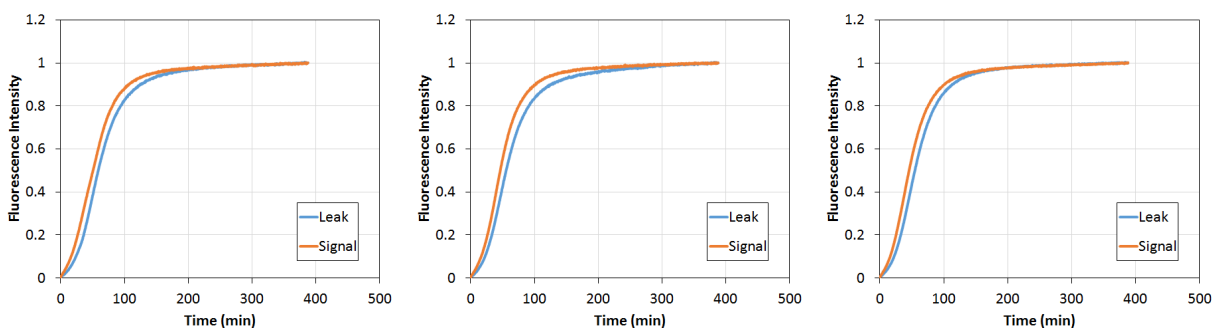

## 1.3 The amplifier with shadow cancellation (100% shadow, 75 nM of cancellation complexes)

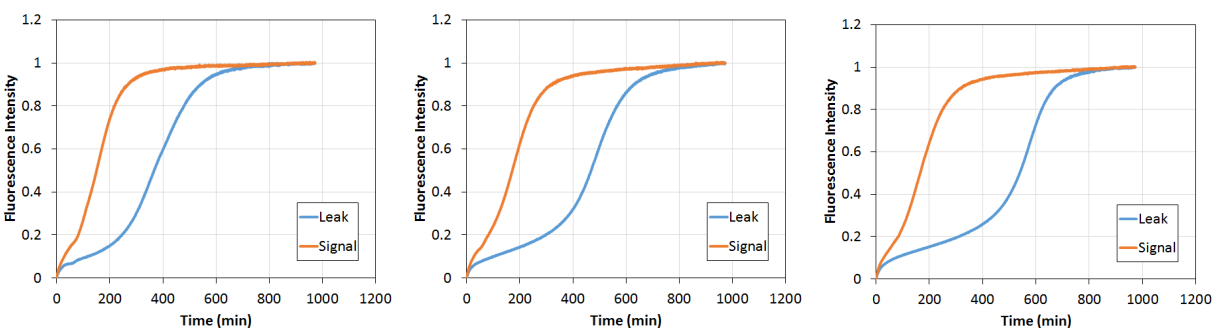

## 1.4 90% shadow

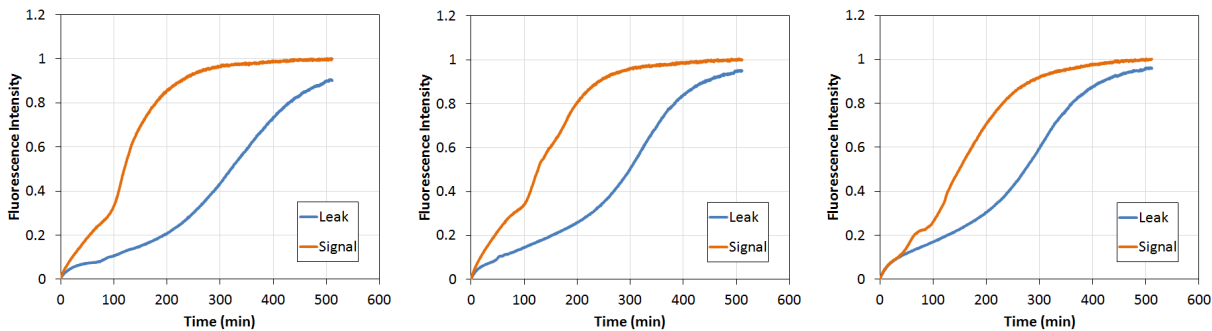

## 1.5 110% shadow

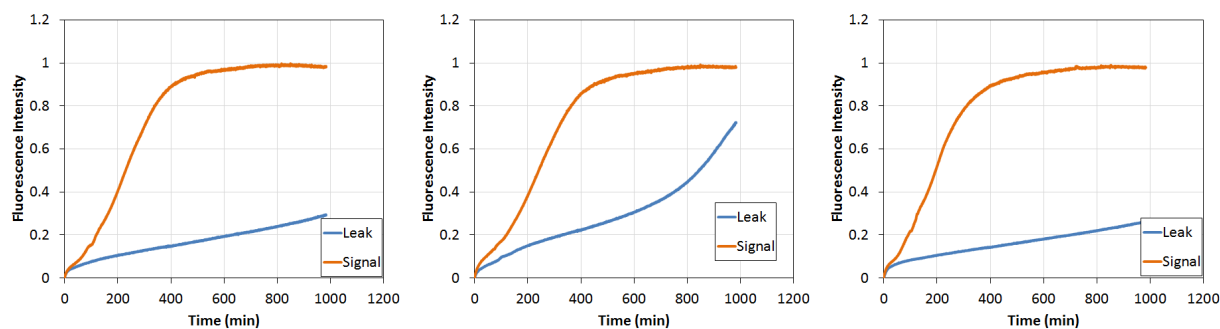

## 1.6 65 nM of cancellation complexes (C1 and C2)

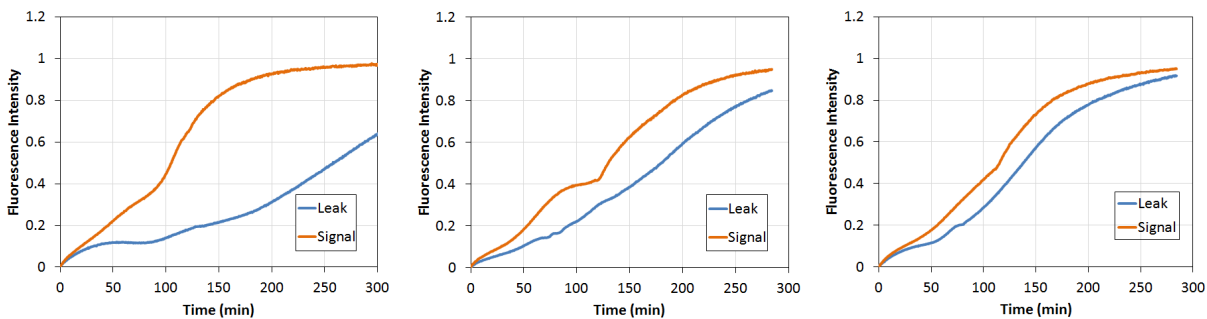

## 1.7 85 nM of cancellation complexes (C1 and C2)

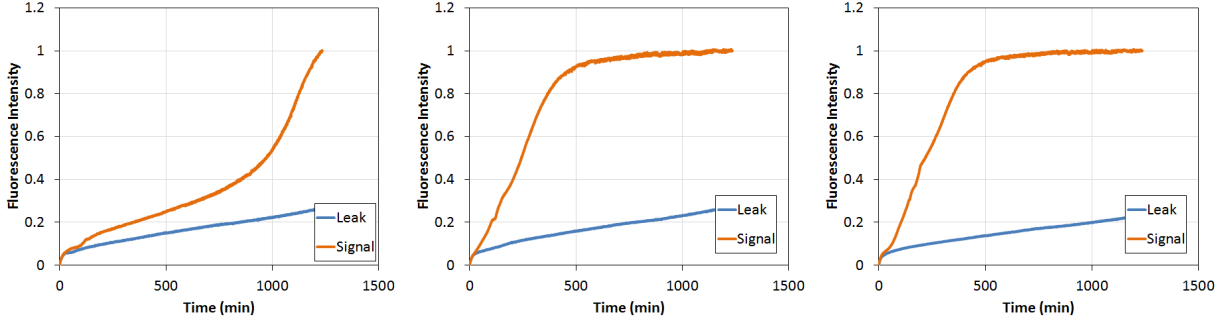

## 1.8 Statistical analysis on SBDs

Here we conduct a statistical analysis on SBDs in different scenarios to evaluate the performance of shadow cancellation. The method that we use is Welch's t-test. Except the scenario with 65 nM of C1 and C2, in all other scenarios, the difference is statistically significant (p-value  $< 0.05$ ).

Table 1: SBDs from three repeats in different scenarios.

|                                 |                        |
|---------------------------------|------------------------|
| The amplifier                   | 0.0953, 0.0713, 0.0609 |
| 100% shadow, 75 nM of C1 and C2 | 0.6330, 0.6300, 0.6293 |
| 90% shadow                      | 0.6237, 0.5455, 0.4315 |
| 110% shadow                     | 0.6659, 0.5882, 0.6738 |
| 65 nM of C1 and C2              | 0.5894, 0.2485, 0.1451 |
| 85 nM of C1 and C2              | 0.5554, 0.6653, 0.6832 |

Table 2: p-values from Welch's t-tests on SBDs.

|                                 |               |
|---------------------------------|---------------|
|                                 | The amplifier |
| 100% shadow, 75 nM of C1 and C2 | 0.0003        |
| 90% shadow                      | 0.0124        |
| 110% shadow                     | 0.0008        |
| 65 nM of C1 and C2              | 0.2008        |
| 85 nM of C1 and C2              | 0.0033        |

## 2 The Universality of Shadow Cancellation

Here, we study the effect of shadow cancellation on some abstract chemical reaction networks by simulation using LBS.<sup>1,2</sup>

### 2.1 Auto-catalytic amplifier

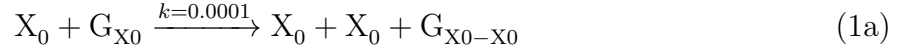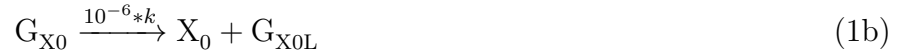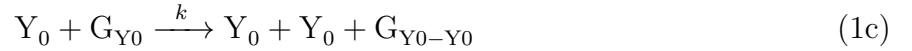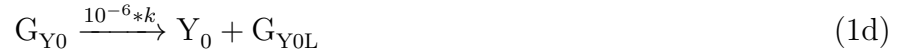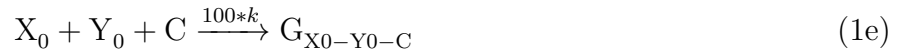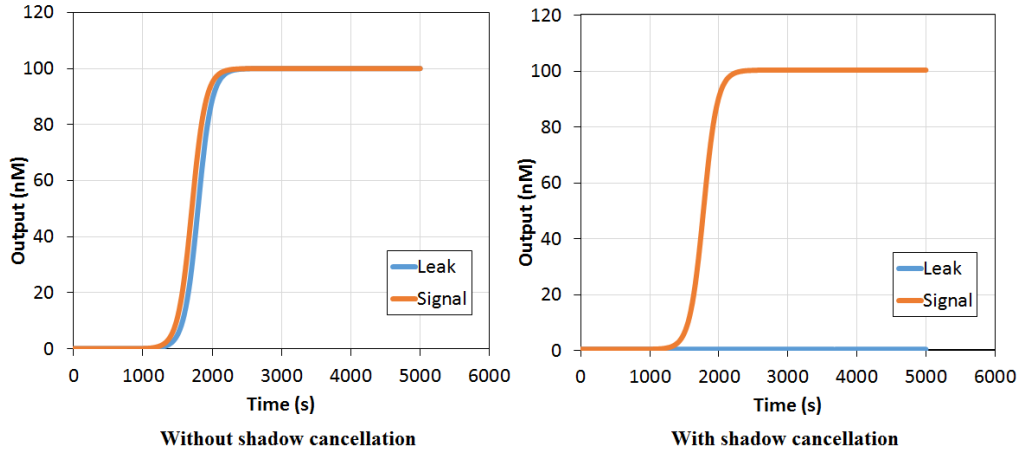

Figure 1: Simulation of shadow cancellation on an auto-catalytic amplifier. The initial state:  $[G_{X0}] = [G_{Y0}] = 100$  nM. For the cases of "Leak",  $[X_0] = 0$  nM. For the cases of "Signal",  $[X_0] = 10^{-6}$  nM. For the cases with shadow cancellation,  $[C] = 100$  nM.  $X_0$  is the output.

Reactions (1a) and (1b) describe the primary auto-catalytic amplifier, where (1a) is the designed amplification and (1b) is the leak (much slower than (1a)). Reactions (1c) and (1d) describe the shadow amplifier. Reaction (1e) describes the cancellation, which is faster than (1a) and (1c) such that it is preferred by  $X_0$  and  $Y_0$  when cancellation is needed. Shadow cancellation improves the performance of this auto-catalytic amplifier as shown in Figure 1.

## 2.2 Cross-catalytic amplifier

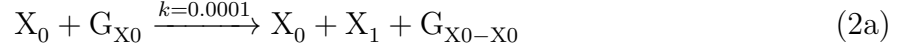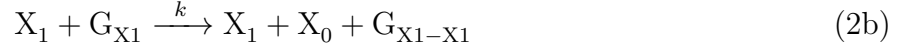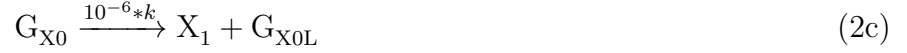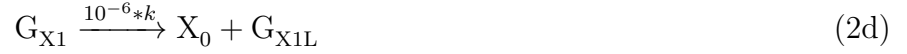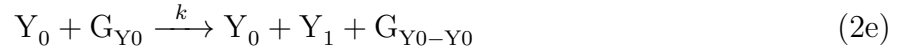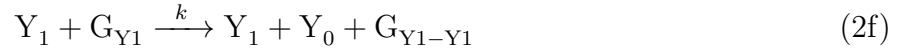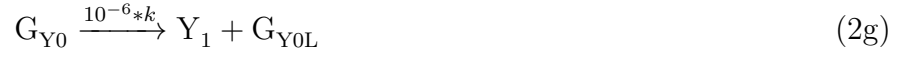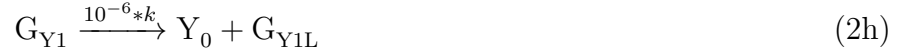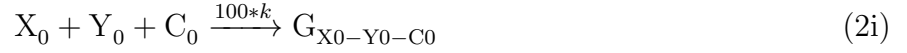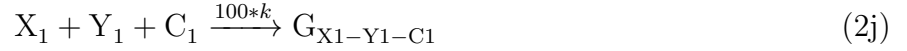

Reactions (2a) to (2d) describe the primary cross-catalytic amplifier. (2a) and (2b) are the designed amplifications. (2c) and (2d) are the leak (much slower than (2a) and (2b)). Reactions (2e) to (2h) describe the shadow amplifier. Reactions (2i) and (2j) describe the cancellation. Shadow cancellation improves the performance of this cross-catalytic amplifier as shown in Figure 2.

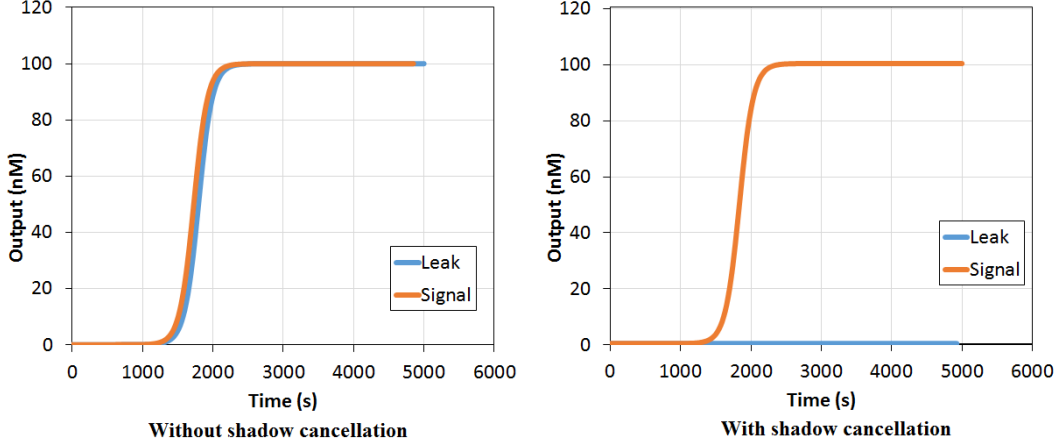

Figure 2: Simulation of shadow cancellation on a cross-catalytic amplifier. The initial state:  $[G_{X0}] = [G_{X1}] = [G_{Y0}] = [G_{Y1}] = 100$  nM. For the cases of "Leak",  $[X_0] = 0$  nM. For the cases of "Signal",  $[X_0] = 10^{-6}$  nM. For the cases with shadow cancellation,  $[C_1] = [C_2] = 100$  nM.  $X_0$  is the output.

### 2.3 Quadratic amplifier

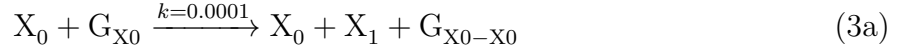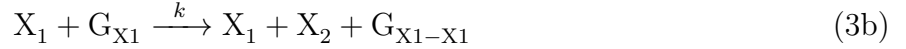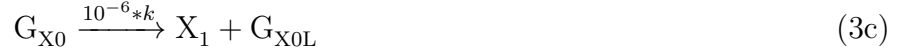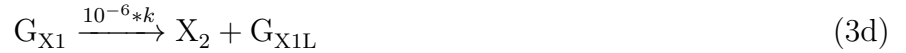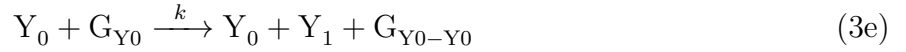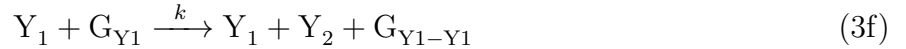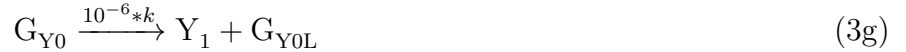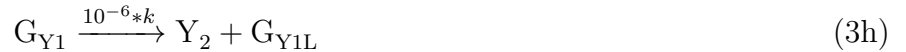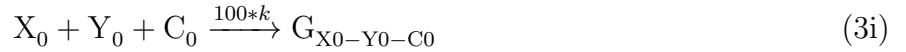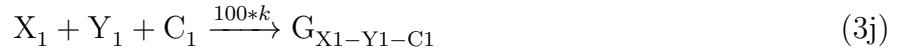

Reactions (3a) to (3d) describe the primary quadratic amplifier. (3a) and (3b) are the designed amplifications. (3c) and (3d) are the leak (much slower than (3a) and (3b)). Reactions (3e) to (3h) describe the shadow amplifier. Reactions (3i) and (3j) describe the cancella-

tion. Shadow cancellation improves the performance of this quadratic amplifier as shown in Figure 3.

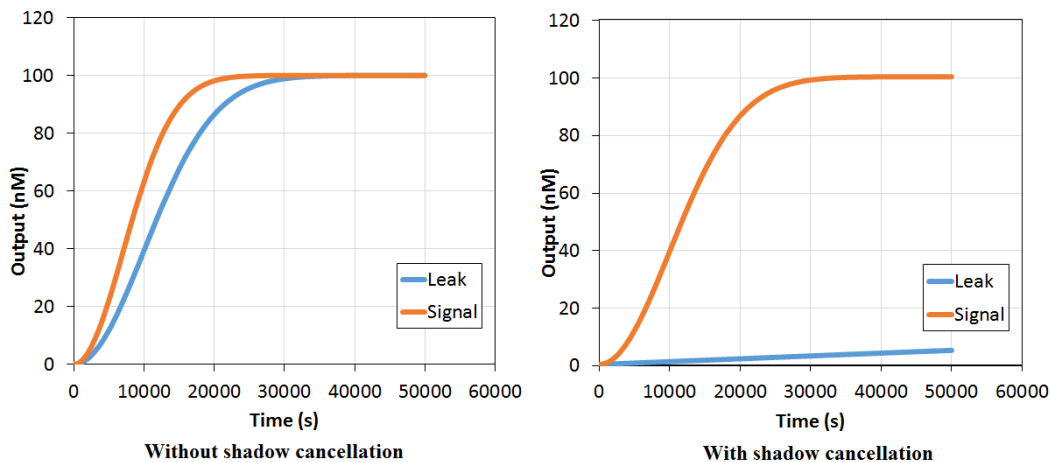

Figure 3: Simulation of shadow cancellation on a quadratic amplifier. The initial state:  $[G_{X0}] = [G_{X1}] = [G_{Y0}] = [G_{Y1}] = 100$  nM. For the cases of "Leak",  $[X_0] = 0$  nM. For the cases of "Signal",  $[X_0] = 10^{-6}$  nM. For the cases with shadow cancellation,  $[C_1] = [C_2] = 100$  nM.  $X_2$  is the output.

## References

- (1) Pedersen, M.; Phillips, A. Towards Programming Languages for Genetic Engineering of Living Cells. *J. R. Soc. Interface* **2009**, *6*, S437–S450.
- (2) Pedersen, M.; Plotkin, G. D. *Transactions on Computational Systems Biology XII*; Springer: Berlin, Heidelberg, 2010; pp 77–145.
